# Supplementary material
Source: publisher site journal article supplement (https://static.cambridge.org/content/id/urn:cambridge.org:id:article:S0022112012004533/resource/name/FLM1200453_SupplementaryMaterial.pdf)
Supplement: Supplementary file 1 [file FLM1200453_SupplementaryMaterial.pdf]

# Supplementary material: Dynamical separation of spherical bodies in supersonic flow

S. J. LAURENCE, N. J. PARZIALE,  
AND R. DEITERDING

## 1. Further comparisons of unsteady experimental and computational results

In figure 1 is shown a full nondimensional comparison of experimental and computational results for  $r_2/r_1=0.5$  and  $\theta_0=-0.1^\circ$ , i.e., the configuration of the experiment shown in figure 9b of the full manuscript. Plotted are nondimensional displacements, nondimensional velocities, and force coefficients. The reader is referred to § 4.2 for a description of the methodology for comparing results.

## 2. Tabulated results from computational refinement study

As further reference data, in tables 1 and 2 are tabulated results from the computational refinement study of § 3.2: provided are the  $x$ - and  $y$ -positions of the secondary and primary spheres, the velocities, and the integral hydrodynamic force components at  $t = T + 4$  and  $t = T + 12$ , respectively. Both sphere centres remain essentially within the plane  $z = 1$  throughout all runs and thus, besides some negligible variations to within the accuracy of the numerical method,  $v_z \equiv 0$  and  $f_z \equiv 0$  can be assumed.

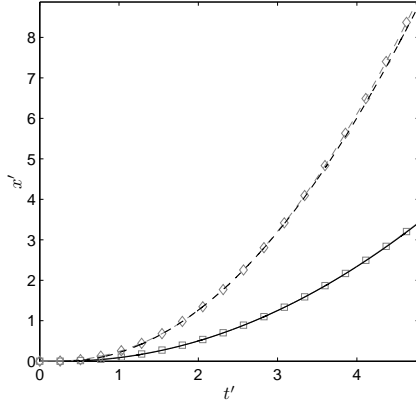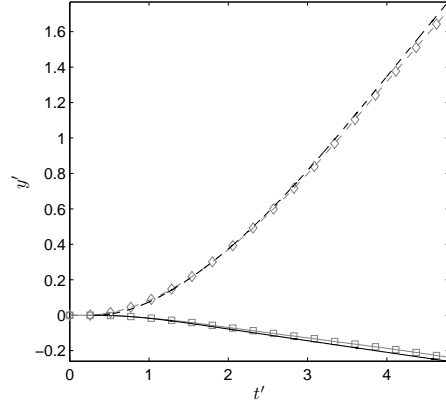(a) Normalised  $x$ - and  $y$ -displacements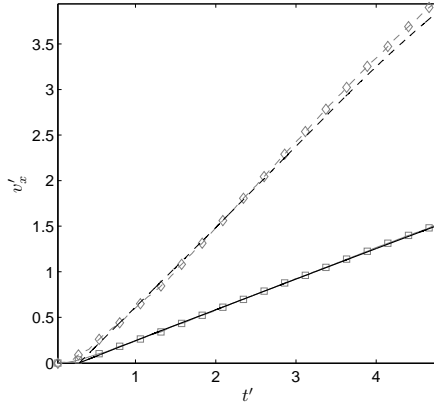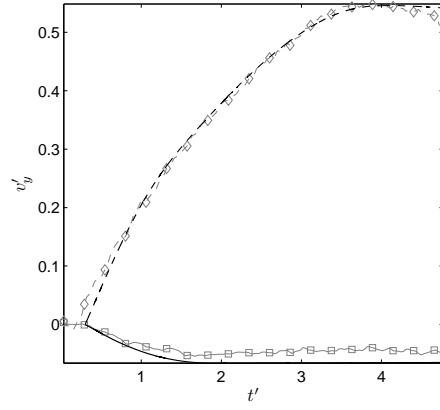

(b) Normalized velocities

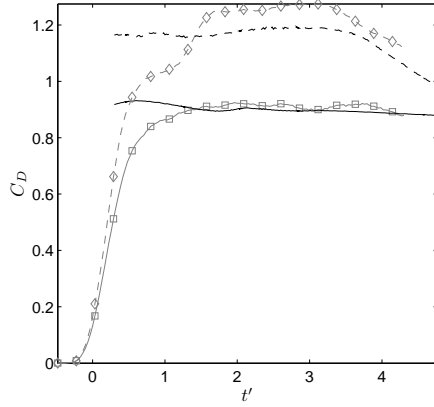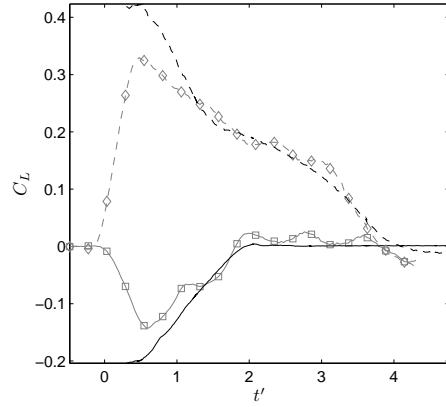

(c) Drag and lift coefficients

FIGURE 1. Comparison of experimental and computational results for  $r_2/r_1=0.5$  and  $\theta_0=-0.1^\circ$ :  $\text{—}\square\text{—}$ , experimental primary sphere;  $\text{—}$ , computational primary sphere;  $\text{---}\diamond\text{---}$ , experimental secondary sphere;  $\text{---}$ , computational secondary sphere. The normalised variables are:  $t' = \sqrt{\rho_a/\rho_m}tV/r_1$ ,  $x' = (x - x(0))/r_1$  and  $y' = (y - y(0))/r_1$ ;  $v'_x = \sqrt{\rho_m/\rho_a}v_x/V$  and  $v'_y = \sqrt{\rho_m/\rho_a}v_y/V$ ;  $C_D = 8a_x r/(3\rho_a V^2)$  and  $C_L = 8a_y r/(3\rho_a V^2)$ .

|   |  | Secondary |        |           |           |           |           |  |        | Primary |           |           |        |           |  |
|---|--|-----------|--------|-----------|-----------|-----------|-----------|--|--------|---------|-----------|-----------|--------|-----------|--|
| # |  | $x$       | $y$    | $10\,v_x$ | $10^2v_y$ | $10\,f_x$ | $10\,f_y$ |  | $x$    | $y$     | $10\,v_x$ | $10^2v_y$ | $f_x$  | $10^2f_y$ |  |
| 1 |  | 0.5787    | 1.3821 | 1.107     | 2.692     | 0.6146    | 1.3372    |  | 0.4637 | 0.9752  | 0.5552    | -0.995    | 1.2126 | -6.237    |  |
| 2 |  | 0.5734    | 1.3864 | 1.086     | 2.860     | 0.6124    | 1.3337    |  | 0.4629 | 0.9756  | 0.5531    | -0.958    | 1.2458 | -4.358    |  |
| 3 |  | 0.5726    | 1.3875 | 1.081     | 2.893     | 0.6050    | 1.3211    |  | 0.4637 | 0.9759  | 0.5570    | -0.949    | 1.2378 | -3.654    |  |
| 4 |  | 0.5701    | 1.3887 | 1.069     | 2.924     | 0.5965    | 1.3238    |  | 0.4635 | 0.9761  | 0.5565    | -0.930    | 1.2438 | -2.881    |  |
| 5 |  | 0.5686    | 1.3892 | 1.063     | 2.933     | 0.5919    | 1.3191    |  | 0.4629 | 0.9762  | 0.5549    | -0.921    | 1.2437 | -2.499    |  |
| 6 |  | 0.5667    | 1.3895 | 1.054     | 2.933     | 0.5876    | 1.3070    |  | 0.4623 | 0.9764  | 0.5529    | -0.911    | 1.2463 | -2.056    |  |

TABLE 1. Positions, velocities, and integral hydrodynamic forces acting on the secondary and primary spheres at  $t = T + 4$  for the six verification setups.

| Secondary |        |        |           |           |           |           | Primary |        |           |           |        |           |  |
|-----------|--------|--------|-----------|-----------|-----------|-----------|---------|--------|-----------|-----------|--------|-----------|--|
| #         | $x$    | $y$    | $10\,v_x$ | $10^2v_y$ | $10\,f_x$ | $10\,f_y$ | $x$     | $y$    | $10\,v_x$ | $10^2v_y$ | $f_x$  | $10^2f_y$ |  |
| 1         | 2.3114 | 1.7769 | 3.158     | 7.040     | 5.146     | 0.9521    | 1.3307  | 0.8944 | 1.6109    | -1.001    | 1.1899 | 0.0968    |  |
| 2         | 2.2589 | 1.7954 | 3.039     | 6.959     | 4.768     | 0.6825    | 1.3283  | 0.8986 | 1.6053    | -0.953    | 1.2057 | 0.3427    |  |
| 3         | 2.2396 | 1.7940 | 2.999     | 6.802     | 4.659     | 0.5910    | 1.3352  | 0.9000 | 1.6169    | -0.938    | 1.2207 | 0.2674    |  |
| 4         | 2.2108 | 1.7901 | 2.948     | 6.611     | 4.547     | 0.4738    | 1.3350  | 0.9019 | 1.6172    | -0.918    | 1.2208 | 0.1671    |  |
| 5         | 2.1974 | 1.7864 | 2.925     | 6.472     | 4.539     | 0.4030    | 1.3337  | 0.9030 | 1.6168    | -0.903    | 1.2209 | 0.2763    |  |
| 6         | 2.1821 | 1.7823 | 2.903     | 6.366     | 4.517     | 0.3757    | 1.3316  | 0.9041 | 1.6148    | -0.892    | 1.2209 | 0.2477    |  |

TABLE 2. Positions, velocities, and integral hydrodynamic forces of the secondary and primary spheres at  $t = T + 12$  for the six verification setups.
